# Supplementary material for: Blockade of histamine receptor H1 augments immune checkpoint therapy by enhancing MHC-I expression in pancreatic cancer cells
Source: PubMed Central journal article supplement (PMC11077718; doi:10.1186/s13046-024-03060-5), 2024-05-08

# Supplementary Figure 4

**A**

## TCGA-PDAC

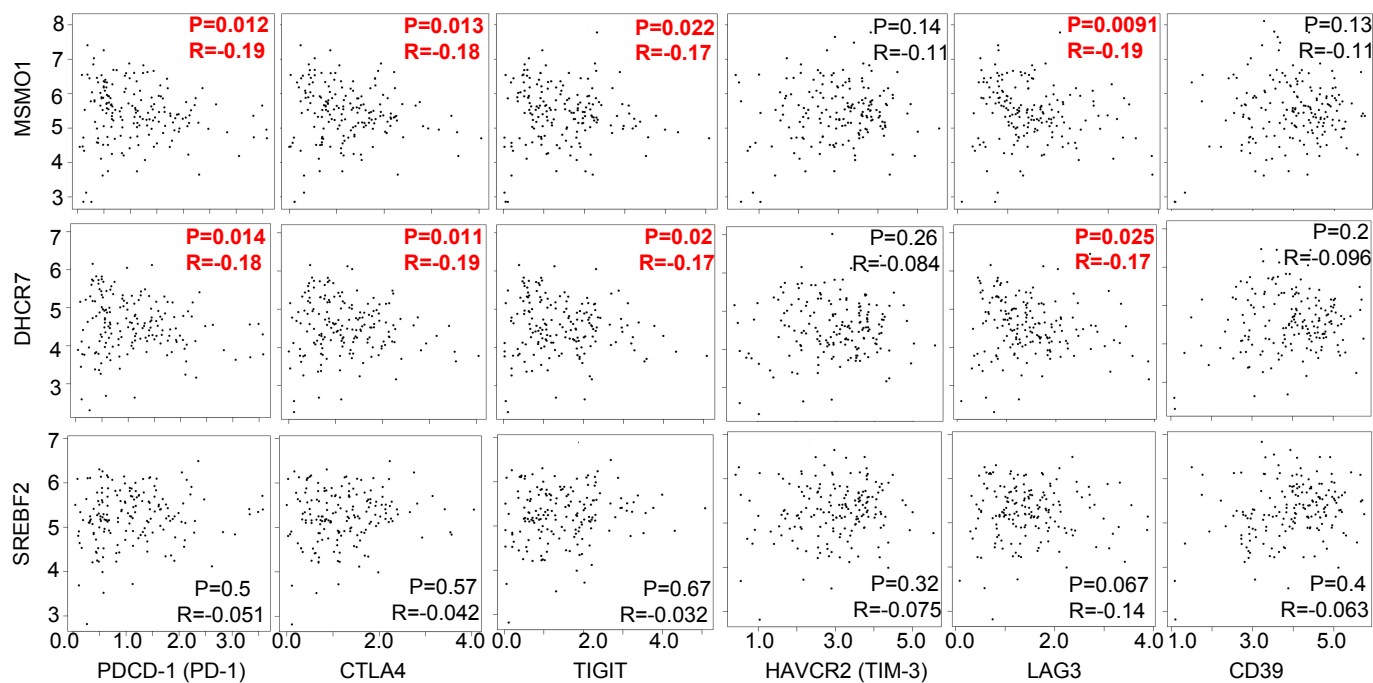

**B**

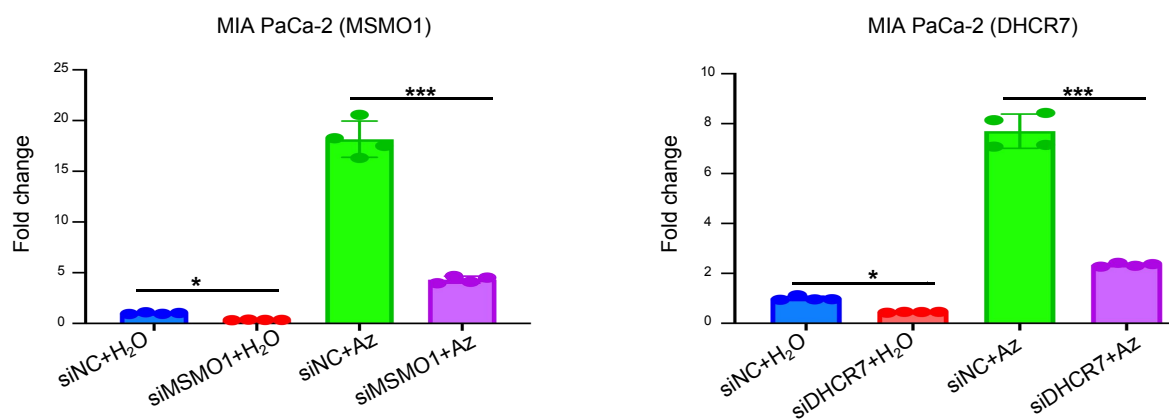

Supplement: 13046_2024_3060_MOESM4_ESM.pdf [file 13046_2024_3060_MOESM4_ESM.pdf]
